# Supplementary material for: Differences in Metabolite Profiles of Dihydroberberine and Micellar Berberine in Caco-2 Cells and Humans—A Pilot Study
Source: MDPI journal article supplement (doi:10.3390/ijms25115625), 2024-05-22
Supplement: s1 [file s1]

Table S1. HRMS data extraction parameters for berberine and its metabolites

| Compound Name                                                   | Compound Formula | Adduct | m/z      | Retention Time |
|-----------------------------------------------------------------|------------------|--------|----------|----------------|
| Benzanilide                                                     | C13H11NO         | M+H    | 198.0913 | 3.78           |
| Berberine                                                       | C20H18NO4        | M+H    | 336.1230 | 2.38           |
| Jatrorrhizine                                                   | C20H20NO4        | M      | 338.1387 | 2.02           |
| Columbamine                                                     | C20H20NO5        | M      | 338.1387 | 2.29           |
| Dihydroberberine                                                | C20H19NO4        | M+H    | 338.1387 | 2.73           |
| Demethyleneberberine (DB)                                       | C19H18NO4        | M+H    | 324.1230 | 2.06           |
| Demethyleneberberine Glucuronide (DB-glu)                       | C25H26NO10       | M+H    | 500.1551 | 1.93           |
| Jatrorrhizine Glucuronide                                       | C26H28NO10       | M+H    | 514.1708 | 2.03           |
| Columbamine Glucuronide                                         | C26H28NO10       | M+H    | 514.1708 | 2.10           |
| Berberrubine                                                    | C19H16NO4        | M+H    | 322.1074 | 2.86           |
| Thalifendine                                                    | C19H16NO4        | M+H    | 322.1074 | 2.25           |
| Berberrubine Glucuronide                                        | C25H24NO10       | M+H    | 498.1395 | 2.19           |
| Thalifendine Glucuronide                                        | C25H24NO10       | M+H    | 498.1395 | 1.99           |
| Berberrubine or Thalifendine Sulfate (Bbrb/Thalif SO4)          | C19H16NO7S       | M+H    | 402.0642 | 2.85           |
| Demethyleneberberine Sulfate (DB SO4)                           | C19H16NO7S       | M+H    | 404.0798 | 2.75           |
| Jatrorrhizine 3-O-Sulfate (Jatrorrhizine SO4)                   | C20H19NO7S       | M+H    | 418.0955 | 2.75           |
| Dihydroxy- Berberrubine or Thalifendine (dihydroxy-Bbrb/Thalif) | C19H16NO6        | M+H    | 354.0972 | 2.76           |
| Dihydroxyberberine                                              | C20H18NO6        | M      | 368.1129 | 2.07           |

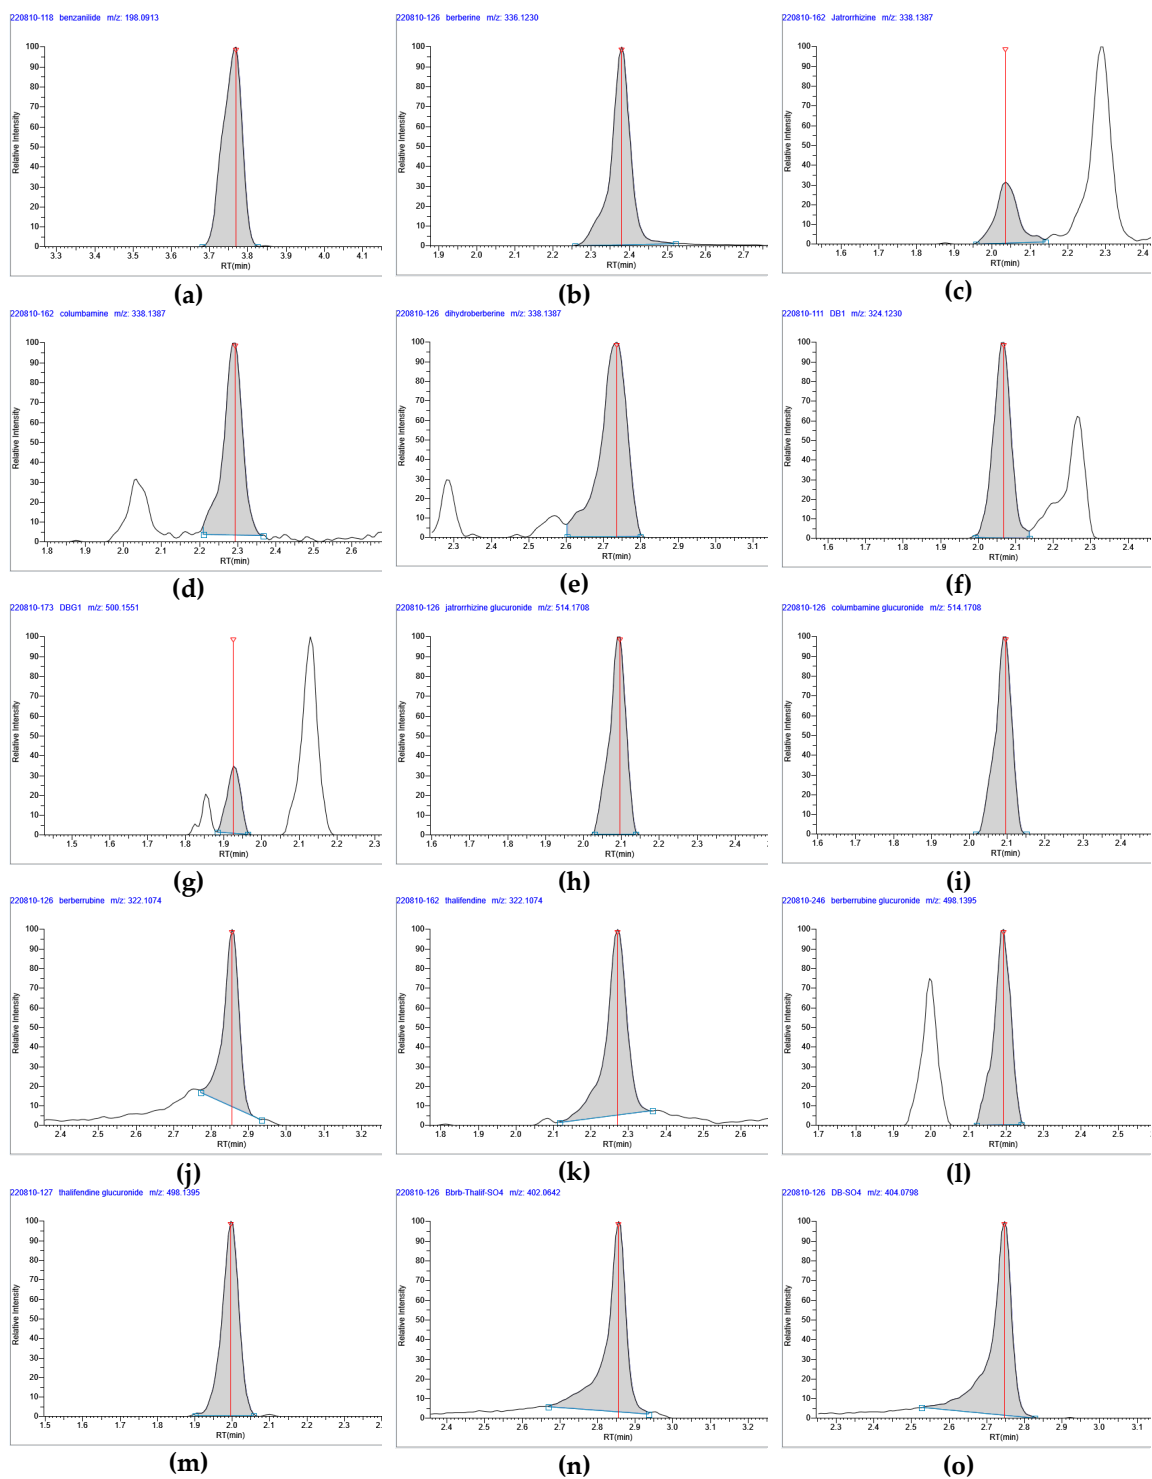

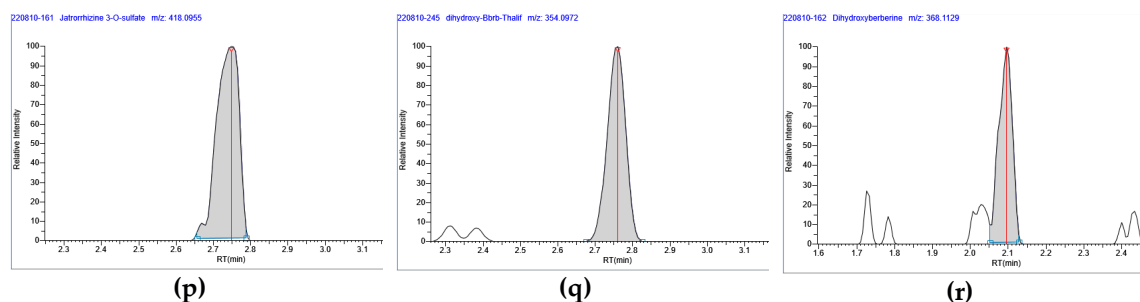

**Figure S1:** LC-HRMS chromatograms of berberine and its metabolites. (a) benzanilide (internal standard), (b) berberine, (c) jatrorrhizine, (d) columbamine, (e) dihydroberberine, (f) demethyleneberberine, (g) demethyleneberberine glucuronide, (h) jatrorrhizine glucuronide, (i) columbamine glucuronide, (j) berberrubine, (k) thalifendine, (l) berberrubine glucuronide, (m) thalifendine glucuronide, (n) berberrubine or thalifendine sulfate, (o) demethyleneberberine sulfate, (p) jatrorrhizine 3-o-sulfate, (q) dihydroxy-berberrubine or thalifendine, and (r) dihydroxyberberine

**Table S2.** Summary of observed differences in DHB and LMB treatments in Caco-2 metabolites and Human blood metabolites.

| Compound Name    | Chemical Structure                                                                  | Concentrations in Caco-2 cell (ng/mL) |         | Concentrations in Human Blood (ng/mL) |               |
|------------------|-------------------------------------------------------------------------------------|---------------------------------------|---------|---------------------------------------|---------------|
|                  |                                                                                     | DHB                                   | LMB     | DHB                                   | LMB           |
| Dihydroberberine | 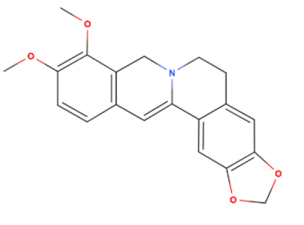 | ND                                    | 22 ± 2  | 0.85 ± 0.45                           | 0.012 ± 0.007 |
| Berberrubine     |  | 0.75 ± 0.10                           | 43 ± 7  | 1.3 ± 0.4                             | 0.085 ± 0.03  |
| Thalifendine     |  | 0.0083 ± 0.0008                       | ND      | 3.6 ± 1.4                             | 0.73 ± 0.12   |
| Columbamine      |                                                                                     | 1360 ± 110                            | 56 ± 19 | 1.4 ± 0.8                             | 0.32 ± 0.13   |

|                                                                  |                                                                                     |               |                          |                          |                          |
|------------------------------------------------------------------|-------------------------------------------------------------------------------------|---------------|--------------------------|--------------------------|--------------------------|
| Jatrorrhizine                                                    | 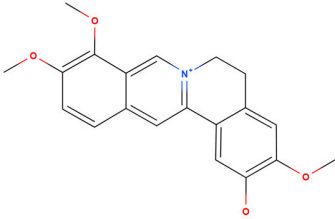   | 0.032 ± 0.014 | 0.004 ± 0.004            | 1.07 ± 0.25              | 0.59 ± 0.16              |
|                                                                  |                                                                                     |               |                          |                          |                          |
| Demethyleneberberine                                             |    | 0.23 ± 0.04   | 0.98 ± 0.14              | 7.9 ± 2.7                | 0.12 ± 0.05              |
|                                                                  |                                                                                     |               |                          |                          |                          |
| Dihydroxyberberine                                               |   | ND            | ND                       | 0.16 ± 0.06              | 0.0023 ± 0.0013          |
|                                                                  |                                                                                     |               |                          |                          |                          |
| Dihydroxy-berberrubine (top) and Dihydroxy-thalifendine (bottom) |  | ND            | 0.14 ± 0.03 <sup>‡</sup> | 0.25 ± 0.10 <sup>‡</sup> | 0.25 ± 0.10 <sup>‡</sup> |
|                                                                  |  |               |                          |                          |                          |
| Berberrubine glucuronide                                         |                                                                                     | ND            | ND                       | ND                       | 0.055 ± 0.013            |

|                                                    |                                                                                     |                    |                 |                   |                     |
|----------------------------------------------------|-------------------------------------------------------------------------------------|--------------------|-----------------|-------------------|---------------------|
|                                                    | 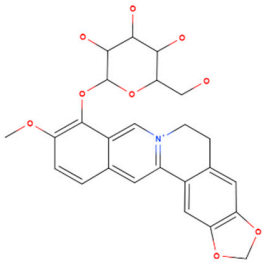   |                    |                 |                   |                     |
| Thalifendine glucuronide                           |    | ND                 | ND              | $0.21 \pm 0.12$   | $0.06 \pm 0.01$     |
| Jatrorrhizine glucuronide                          |   | $0.0023 \pm 0.002$ | ND              | $0.050 \pm 0.043$ | $0.019 \pm 0.007$   |
| Columbamine glucuronide                            |  | ND                 | ND              | $0.07 \pm 0.04$   | $0.007 \pm 0.003$   |
| Demethyleneberberine glucuronide (DBG)             |  | ND                 | ND              | $0.098 \pm 0.044$ | $0.0098 \pm 0.0036$ |
| Demethyleneberberine sulfate (DB SO <sub>4</sub> ) |                                                                                     | $0.27 \pm 0.04$    | $0.78 \pm 0.10$ | $2.4 \pm 0.8$     | $0.35 \pm 0.05$     |

|                                                                                                                 |                                                                                                                                                                           |                                                                                    |                                                                                     |
|-----------------------------------------------------------------------------------------------------------------|---------------------------------------------------------------------------------------------------------------------------------------------------------------------------|------------------------------------------------------------------------------------|-------------------------------------------------------------------------------------|
| 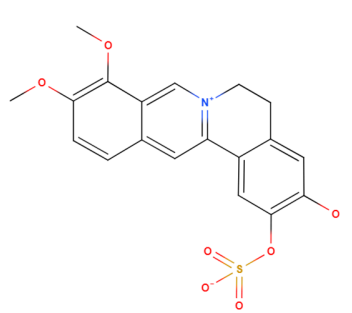 <p>Jatrorrhizine sulfate</p>  |  <p>Berberrubine sulfate (top) and thalifendine sulfate (bottom) (Bbrb/Thalif SO4)</p>  |   |   |
|  <p>Jatrorrhizine sulfate</p>  |  <p>Berberrubine sulfate (top) and thalifendine sulfate (bottom) (Bbrb/Thalif SO4)</p>  |   |   |
|  <p>Jatrorrhizine sulfate</p> |  <p>Berberrubine sulfate (top) and thalifendine sulfate (bottom) (Bbrb/Thalif SO4)</p> |  |  |

ND = Not detected. Mean  $\pm$  SEM reported. # Results reported are the sums of both compounds.

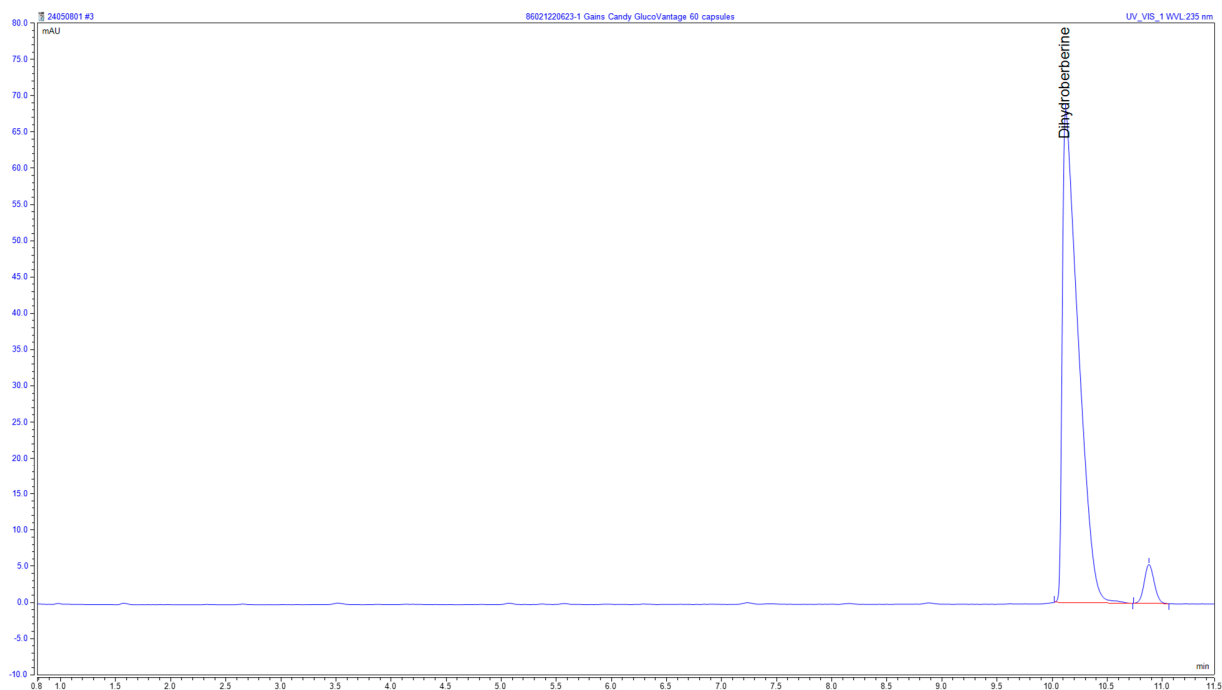

(a)

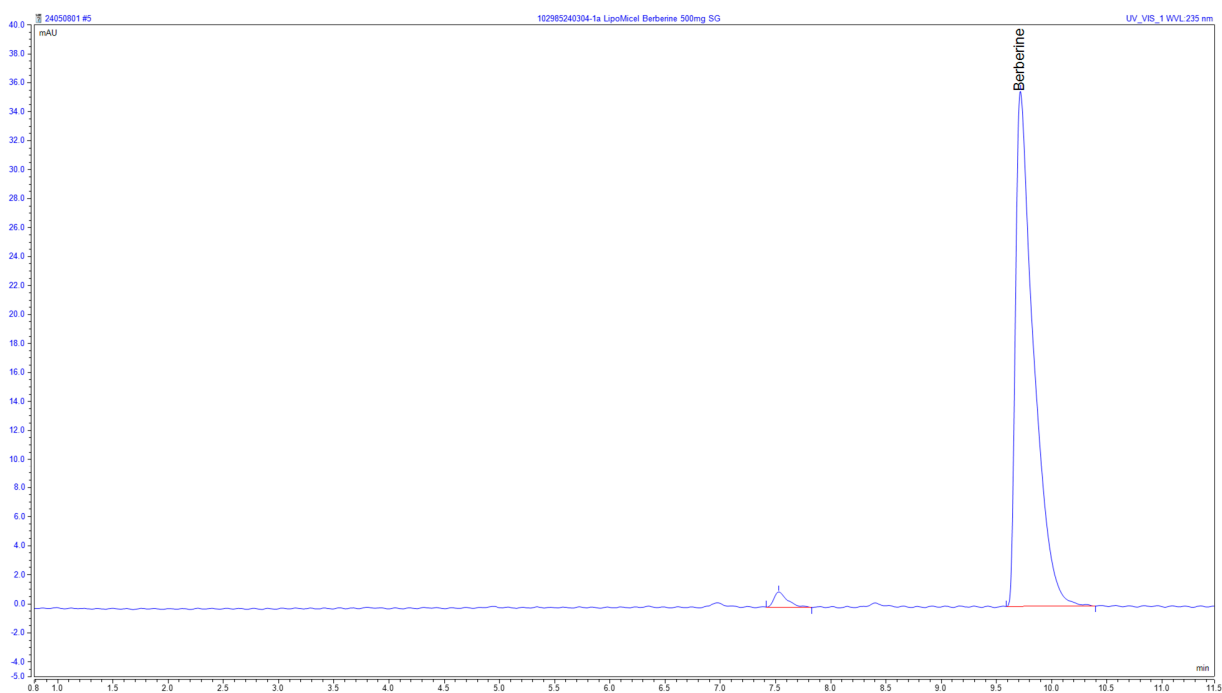

(b)

Figure S2: UHPLC chromatograms of study treatments. (a) DHB, chromatogram confirmed the identity and purity of dihydroberberine at its characteristic retention time of 10.12 minute with no detectable amount of berberine. The smaller peak at 10.9 minute likely resulted from the black pepper extract. (b) LMB, chromatogram confirmed the identity and purity of berberine at its characteristic retention time of 9.72 minute with no detectable amount of dihydroberberine. The smaller peak at 7.5 minute likely resulted from one of the excipients used to manufacture the capsule.
